# Supplementary material for: Tetranuclear lanthanide-based silsesquioxanes: towards a combination of a slow relaxation of the magnetization and a luminescent thermometry
Source: Royal Society of Chemistry journal article supplement (doi:10.1039/d3ra04901a), 2023-01-01
Supplement: d3ra04901a1.pdf [file d3ra04901a1.pdf]

## ELECTRONIC SUPPORTING INFORMATION

### **Tetranuclear lanthanide-based silsesquioxanes: towards a combination of a slow relaxation of the magnetization and a luminescent thermometry**

Gautier Félix,<sup>a</sup> Saad Sene,<sup>a</sup> Alena Kulakova,<sup>a, b, c</sup> Alexey N. Bilyachenko,<sup>\*b, c</sup> Victor N. Khrustalev,<sup>c, d</sup> Elena S. Shubina,<sup>b</sup> Yannick Guari,<sup>a</sup> and Joulia Larionova<sup>\*a</sup>

<sup>a</sup>*ICGM, Univ. Montpellier, CNRS, ENSCM, Montpellier, France.*

*E-mail: [joulia.larionova@umontpellier.fr](mailto:joulia.larionova@umontpellier.fr)*

<sup>b</sup>*A.N.Nesmeyanov Institute of Organoelement Compounds of Russian Academy of Sciences, 28 Vavilova str., 119334, Moscow, Russia. E-mail: [bilyachenko@ineos.ac.ru](mailto:bilyachenko@ineos.ac.ru)*

<sup>c</sup>*Peoples' Friendship University of Russia, (RUDN University)*

*Miklukho-Maklay Str., 6, 117198, Moscow, Russia*

<sup>d</sup>*Zelinsky Institute of Organic Chemistry, Russian Academy of Sciences, Leninsky Prospect 47, Moscow 119991, Russia*

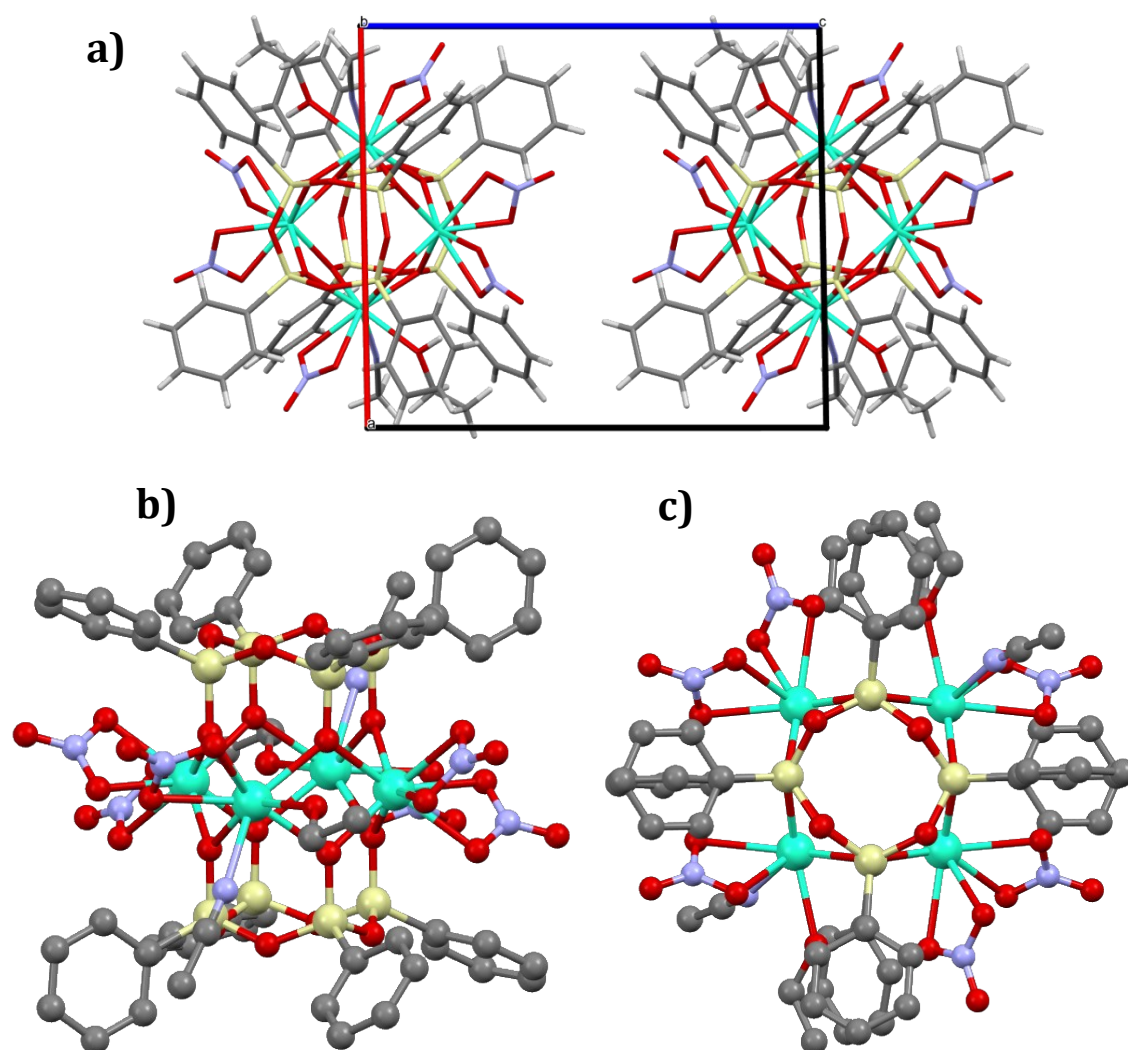

**Figure S1.** a) Perspective view of the crystal packing for **2** along the crystallographic axis *b*; b) and c) Molecular structure of **2** showing the prism-like polyhedron in the form of a new year paper lantern. Colour code: light green Dy/Tb; light yellow Si; red O; blue N; grey C. Hydrogen atoms and crystallized acetonitrile molecules have been omitted for clarity.

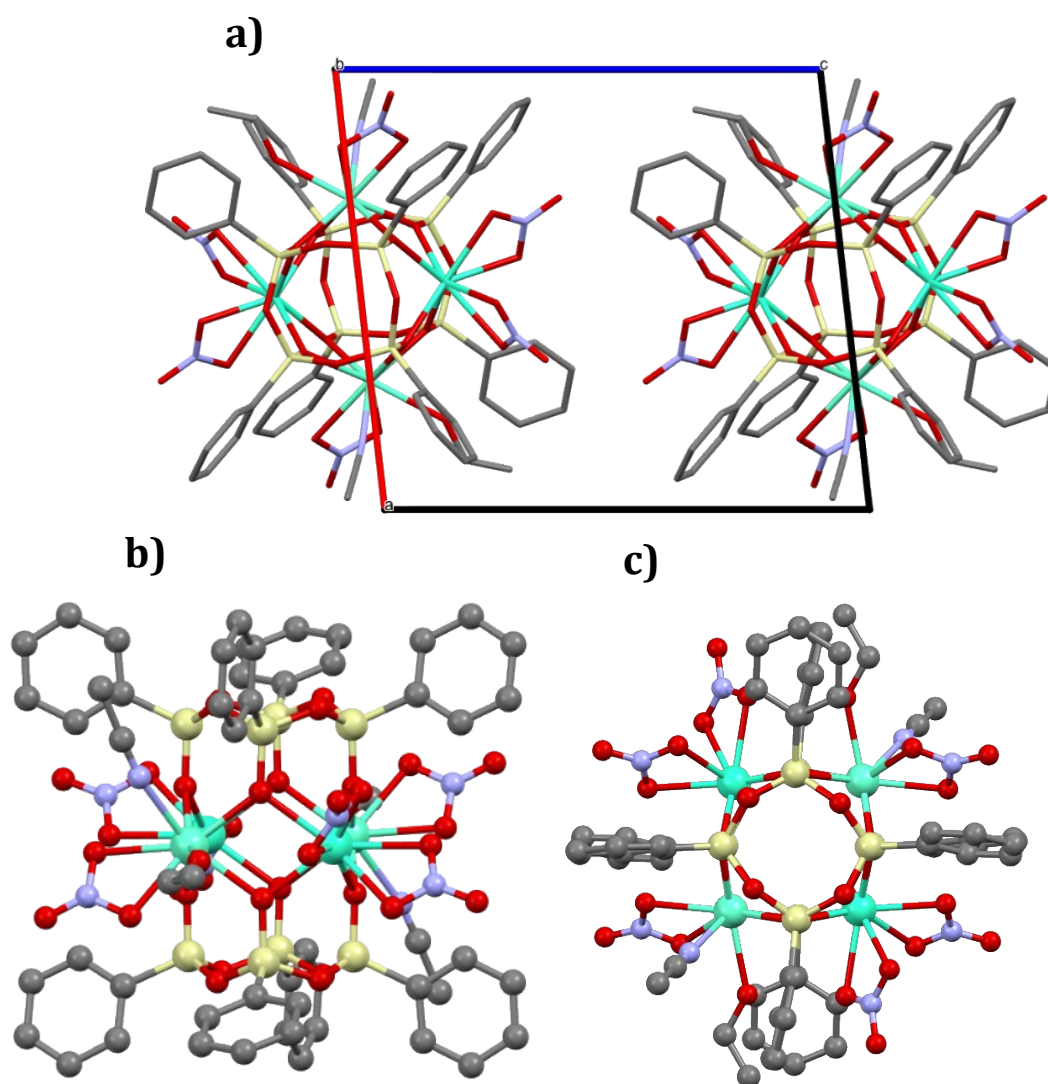

**Figure S2.** a) Perspective view of the crystal packing for **3** along the crystallographic axis *b*; b) and c) Molecular structure of **3** showing the prism-like polyhedron in the form of a new year paper lantern. colour code: light green Eu/Tb/Y; light yellow Si; red O; blue N; grey C. Hydrogen atoms and crystallized acetonitrile molecules have been omitted for clarity.

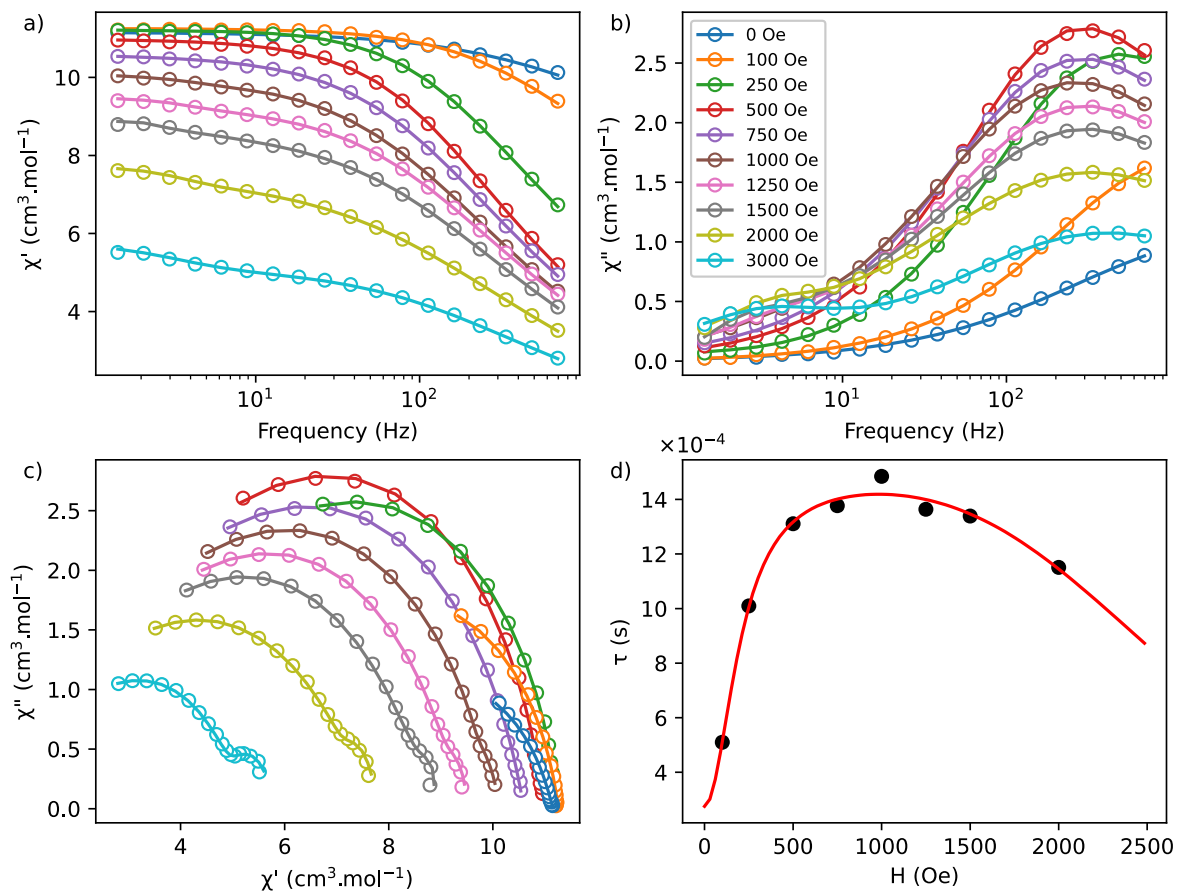

**Figure S3.** In-phase,  $\chi'$ , (a) and out-of-phase,  $\chi''$ , (b) components of the ac magnetic susceptibility as a function of frequency at different magnetic fields measured for **1**; c) Cole-Cole (Argand) plots obtained using the field dependence of the ac susceptibility data for **1**. The solid lines correspond to the best fit obtained with a generalized Debye model; d) Field dependence of the relaxation time for **1** at 1.8 K. The red solid line represents the fits done by using the equation (2).

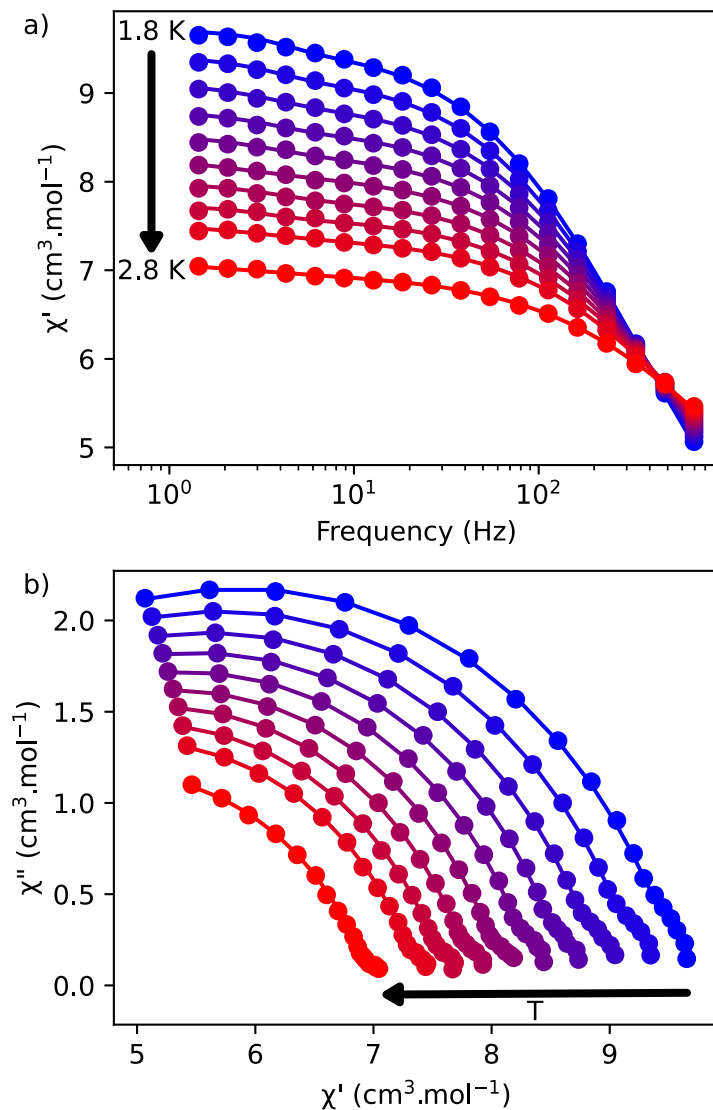

**Figure S4.** a) In phase,  $\chi'$ , component of the ac magnetic susceptibility as a function of frequency at different temperatures measured under an optimal dc field of 1000 Oe for **1**; b) Cole-Cole (Argand) plots obtained using the ac susceptibility data for **1** under an optimal magnetic field of 1000 Oe. The solid lines correspond to the best fit obtained with a generalized Debye model.

**Table S1:** Crystal data, data collection and structure refinement details for **1-3**.

|                                                                               |                                                                                                    |                                                                                                     |                                                                                                     |
|-------------------------------------------------------------------------------|----------------------------------------------------------------------------------------------------|-----------------------------------------------------------------------------------------------------|-----------------------------------------------------------------------------------------------------|
| Identification code                                                           | <b>1</b> • 4MeCN                                                                                   | <b>2</b> • 4MeCN                                                                                    | <b>3</b> • 4MeCN <sub>sq</sub>                                                                      |
| Empirical formula                                                             | C <sub>80</sub> H <sub>110</sub> DyEu <sub>3</sub> N <sub>14</sub> O <sub>36</sub> Si <sub>8</sub> | C <sub>80</sub> H <sub>110</sub> Dy <sub>3</sub> N <sub>14</sub> O <sub>36</sub> Si <sub>8</sub> Tb | C <sub>80</sub> H <sub>110</sub> EuN <sub>14</sub> O <sub>36</sub> Si <sub>8</sub> TbY <sub>2</sub> |
| Formula weight                                                                | 2686.95                                                                                            | 2714.97                                                                                             | 2557.23                                                                                             |
| Crystal size, mm                                                              | 0.15×0.13×0.12                                                                                     | 0.18×0.15×0.15                                                                                      | 0.09×0.09×0.06                                                                                      |
| Crystal system                                                                | Triclinic                                                                                          | Triclinic                                                                                           | Triclinic                                                                                           |
| Space group                                                                   | <i>P</i> -1                                                                                        | <i>P</i> -1                                                                                         | <i>P</i> -1                                                                                         |
| <i>a</i> , Å                                                                  | 13.27830(13)                                                                                       | 13.2584(2)                                                                                          | 12.8840(2)                                                                                          |
| <i>b</i> , Å                                                                  | 13.34642(15)                                                                                       | 13.3275(2)                                                                                          | 13.9471(2)                                                                                          |
| <i>c</i> , Å                                                                  | 16.09392(18)                                                                                       | 16.0668(2)                                                                                          | 15.3005(2)                                                                                          |
| $\alpha$ , deg.                                                               | 68.0627(10)                                                                                        | 68.1098(15)                                                                                         | 67.2399(15)                                                                                         |
| $\beta$ , deg.                                                                | 85.3464(9)                                                                                         | 85.3999(14)                                                                                         | 82.6403(13)                                                                                         |
| $\gamma$ , deg.                                                               | 80.1123(9)                                                                                         | 80.1109(15)                                                                                         | 86.2713(13)                                                                                         |
| <i>V</i> , Å <sup>3</sup>                                                     | 2605.87(5)                                                                                         | 2594.78(7)                                                                                          | 2514.08(7)                                                                                          |
| <i>Z</i>                                                                      | 1                                                                                                  | 1                                                                                                   | 1                                                                                                   |
| Density (calc.), g/cm <sup>3</sup>                                            | 1.712                                                                                              | 1.737                                                                                               | 1.689                                                                                               |
| Absorption coefficient, mm <sup>-1</sup>                                      | 2.668                                                                                              | 2.987                                                                                               | 2.638                                                                                               |
| <i>F</i> (000)                                                                | 1343                                                                                               | 1351                                                                                                | 1294                                                                                                |
| Theta range, deg.                                                             | 2.051-35.300                                                                                       | 2.055-35.427                                                                                        | 2.190-35.386                                                                                        |
| Index ranges                                                                  | -21 ≤ <i>h</i> ≤ 20,<br>-21 ≤ <i>k</i> ≤ 21,<br>-26 ≤ <i>l</i> ≤ 25                                | -19 ≤ <i>h</i> ≤ 21,<br>-21 ≤ <i>k</i> ≤ 21,<br>-25 ≤ <i>l</i> ≤ 26                                 | -19 ≤ <i>h</i> ≤ 20,<br>-22 ≤ <i>k</i> ≤ 21,<br>-24 ≤ <i>l</i> ≤ 23                                 |
| Reflections collected                                                         | 99913                                                                                              | 97988                                                                                               | 66219                                                                                               |
| Independent reflections, <i>R</i> <sub>int</sub>                              | 21545, 0.0477                                                                                      | 21453, 0.0611                                                                                       | 20143, 0.1160                                                                                       |
| Reflections with <i>I</i> > 2σ( <i>I</i> )                                    | 17201                                                                                              | 17586                                                                                               | 12723                                                                                               |
| Parameters refined                                                            | 713                                                                                                | 758                                                                                                 | 544                                                                                                 |
| Goodness-of-fit on <i>F</i> <sup>2</sup>                                      | 1.040                                                                                              | 1.031                                                                                               | 1.030                                                                                               |
| <i>R</i> <sub>1</sub> / w <i>R</i> <sub>2</sub> for <i>I</i> > 2σ( <i>I</i> ) | 0.0282 / 0.0615                                                                                    | 0.0354 / 0.0821                                                                                     | 0.0883 / 0.1886                                                                                     |
| <i>R</i> <sub>1</sub> / w <i>R</i> <sub>2</sub> for all data                  | 0.0439 / 0.0656                                                                                    | 0.0491 / 0.0891                                                                                     | 0.1274 / 0.2038                                                                                     |
| <i>T</i> <sub>max</sub> , <i>T</i> <sub>min</sub>                             | 0.696, 0.633                                                                                       | 0.632, 0.523                                                                                        | 0.844, 0.752                                                                                        |
| Δρ <sub>max</sub> / Δρ <sub>min</sub> , e·Å <sup>-3</sup>                     | 1.580 / -1.583                                                                                     | 2.749 / -2.495                                                                                      | 2.758 / -2.895                                                                                      |

**Table S2:** Main structural parameters for **1-3**.

| Sample   | Ln-O distance, Å                                                                                        | Ln-N distance, Å    | Ln-Ln distance, Å | ∠ O-Ln-O, °                                                                    |
|----------|---------------------------------------------------------------------------------------------------------|---------------------|-------------------|--------------------------------------------------------------------------------|
| <b>1</b> | Ln-O(Ln): 2.310(9)-2.356(9);<br>Ln-NO <sub>3</sub> : 2.436(4)-2.563(3);<br>Ln-EtOH: 2.460(3), 2.468(8)  | 2.551(4), 2.554(10) | 3.726(3)-3.777(3) | (Ln)O-Ln-O(Ln):<br>70.99(9)-81.46(12);<br>NO <sub>3</sub> : 50.66(15)-51.52(8) |
| <b>2</b> | Ln-O(Ln): 2.243(8)-2.376(8);<br>Ln-NO <sub>3</sub> : 2.380(10)-2.567(8);<br>Ln-EtOH: 2.394(8), 2.456(3) | 2.524(4), 2.527(12) | 3.648(2)-3.742(2) | (Ln)O-Ln-O(Ln):<br>70.98(10)-83.4(2)<br>NO <sub>3</sub> : 50.26(15)-52.13(8)   |
| <b>3</b> | Ln-O(Ln): 2.289(4)-2.356(4);<br>Ln-NO <sub>3</sub> : 2.453(5)-2.534(6);<br>Ln-EtOH: 2.442(5), 2.477(6)  | 2.486(6), 2.520(7)  | 3.646(5)-3.718(4) | (Ln)O-Ln-O(Ln):<br>72.04(14)-83.11(16)<br>NO <sub>3</sub> : 51.0(2)-52.70(18)  |

**Table S3:** Main parameters for **1-3** regarding their magnetic properties.

| Sample   | Experimental $\chi T$ values, $\text{cm}^3 \cdot \text{K} \cdot \text{mol}^{-1}$ | Calculated $\chi T$ values, $\text{cm}^3 \cdot \text{K} \cdot \text{mol}^{-1}$                                | Calculated $\chi T$ values for $\text{Ln}^{3+}$                                                                                                                                                                                                     | Magnetization values at 7 kOe, $Nb$ |
|----------|----------------------------------------------------------------------------------|---------------------------------------------------------------------------------------------------------------|-----------------------------------------------------------------------------------------------------------------------------------------------------------------------------------------------------------------------------------------------------|-------------------------------------|
| <b>1</b> | 14.2 $\text{cm}^3 \cdot \text{K} \cdot \text{mol}^{-1}$                          | $\text{Eu}_{3.08}\text{Dy}_{0.92}$<br>13.03 $\text{cm}^3 \cdot \text{K} \cdot \text{mol}^{-1}$                | $\text{Dy}^{3+}$ ( $J=15/2$ , $g = 4/3$ ):<br>14.17 $\text{cm}^3 \cdot \text{K} \cdot \text{mol}^{-1}$<br>$\text{Eu}^{3+}$ is diamagnetic                                                                                                           | 8.8                                 |
| <b>2</b> | 53.9 $\text{cm}^3 \cdot \text{K} \cdot \text{mol}^{-1}$                          | $\text{Dy}_{3.18}\text{Tb}_{0.82}$<br>54.74 $\text{cm}^3 \cdot \text{K} \cdot \text{mol}^{-1}$                | $\text{Dy}^{3+}$ ( $J=15/2$ , $g = 4/3$ ):<br>14.17 $\text{cm}^3 \cdot \text{K} \cdot \text{mol}^{-1}$<br>$\text{Tb}^{3+}$ ( ${}^7F_6$ , $S = 3$ , $L = 3$ ,<br>$g = 3/2$ ): $\chi T = 11.82$<br>$\text{cm}^3 \cdot \text{K} \cdot \text{mol}^{-1}$ | 29.1                                |
| <b>3</b> | 11.9 $\text{cm}^3 \cdot \text{K} \cdot \text{mol}^{-1}$                          | $\text{Y}_{2.11}\text{Eu}_{0.87}\text{Tb}_{1.01}$<br>11.93 $\text{cm}^3 \cdot \text{K} \cdot \text{mol}^{-1}$ | $\text{Tb}^{3+}$ ( ${}^7F_6$ , $S = 3$ , $L = 3$ ,<br>$g = 3/2$ ): $\chi T = 11.82$<br>$\text{cm}^3 \cdot \text{K} \cdot \text{mol}^{-1}$<br>$\text{Eu}^{3+}$ is diamagnetic                                                                        | 6.8                                 |
